# Supplementary material for: STAT3 and NF-κB are Simultaneously Suppressed in Dendritic Cells in Lung Cancer
Source: PubMed Central journal article supplement (PMC5368983; doi:10.1038/srep45395), 2017-03-28
Supplement: srep45395-s1.pdf [file srep45395-s1.pdf]

# Supplementary Information

## STAT3 and NF- $\kappa$ B are Simultaneously Suppressed in Dendritic Cells in Lung Cancer

Rui Li<sup>1,2</sup>, Fang Fang<sup>1,2,\*</sup>, Ming Jiang<sup>1,2</sup>, Chenguang Wang<sup>1,2</sup>, Jiajia Ma<sup>1,2</sup>, Wenyao Kang<sup>1,2</sup>, Qiuyan Zhang<sup>1,2</sup>, Yuhui Miao<sup>1,2</sup>, Dong Wang<sup>1,2</sup>, Yugang Guo<sup>1,2</sup>, Linnan Zhang<sup>1,2</sup>, Yang Guo<sup>1,2</sup>, Hui Zhao<sup>3</sup>, De Yang<sup>4</sup>, Zhigang Tian<sup>1,2</sup>, and Weihua Xiao<sup>1,2,\*</sup>

<sup>1</sup> *The CAS Key Laboratory of Innate Immunity and Chronic Disease, Innovation Center for Cell Signaling Network, School of Life Sciences, University of Science and Technology of China, Hefei, China*

<sup>2</sup> *Hefei National Laboratory for Physical Sciences at Microscale, Engineering Technology Research Center of Biotechnology Drugs, Anhui Province, University of Science and Technology of China, Hefei, China*

<sup>3</sup> *Department of Respiration, Second Affiliated Hospital of Anhui Medical University, Hefei, China*

<sup>4</sup> *Cancer and Inflammation Program, Center for Cancer Research, National Cancer Institute, Frederick National Laboratory for Cancer Research (FNLCR), Frederick, Maryland, USA*

\*Correspondence should be addressed to

W. X., 443 Huangshan Road, School of Life Sciences, University of Science and Technology of China, Hefei, China, 20027. Email: [xiaow@ustc.edu.cn](mailto:xiaow@ustc.edu.cn). Tel: +86 551 6360 6294. Fax: +86 551 6360 0535.

OR F.F., 443 Huangshan Road, School of Life Sciences, University of Science and Technology of China, Hefei, China, 20027. Email: [fangfang@mail.ustc.edu.cn](mailto:fangfang@mail.ustc.edu.cn). Tel: +86 551 6360 0536. Fax: +86 551 6360 0535.

## Supplementary Figures & Tables

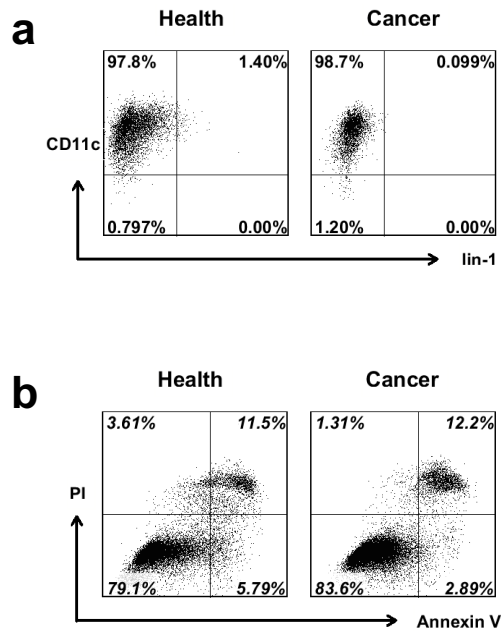

**Figure S1. Tumour-induced DCs maintained normal differentiation.** Human MoDCs were generated in health or cancer group. (a) FACS assay for DC population analysis. Cells were dual labeled with lin-1/CD11c, and FACS data showed typical MoDC generation in both cancer and healthy groups. (b) Apoptosis assay for DCs. Cells were harvested and incubated with AnnexinV-FITC and PI. Dot Plot showed MoDCs cultured in the presence of tumour sera showed no increased apoptosis compared to the healthy controls.

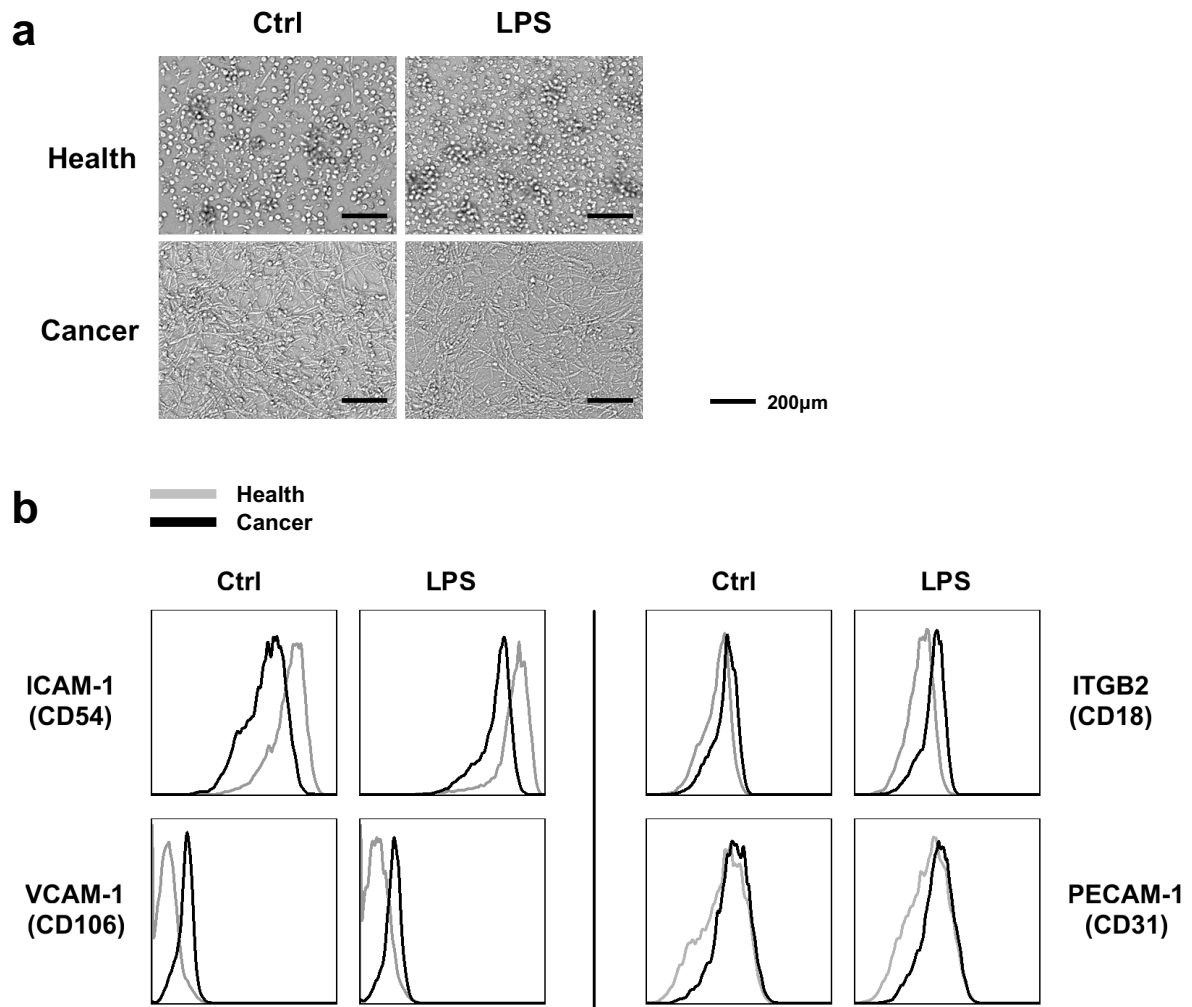

**Figure S2. Tumour-induced DCs morphology changes.** Human MoDCs were generated and further incubated with or without LPS for an additional 2 days. (a) Morphology of DCs in cancer or healthy group. Scale bars represent 200µm. (b) FACS assay for cell surface molecules of immature or mature DCs as indicated.

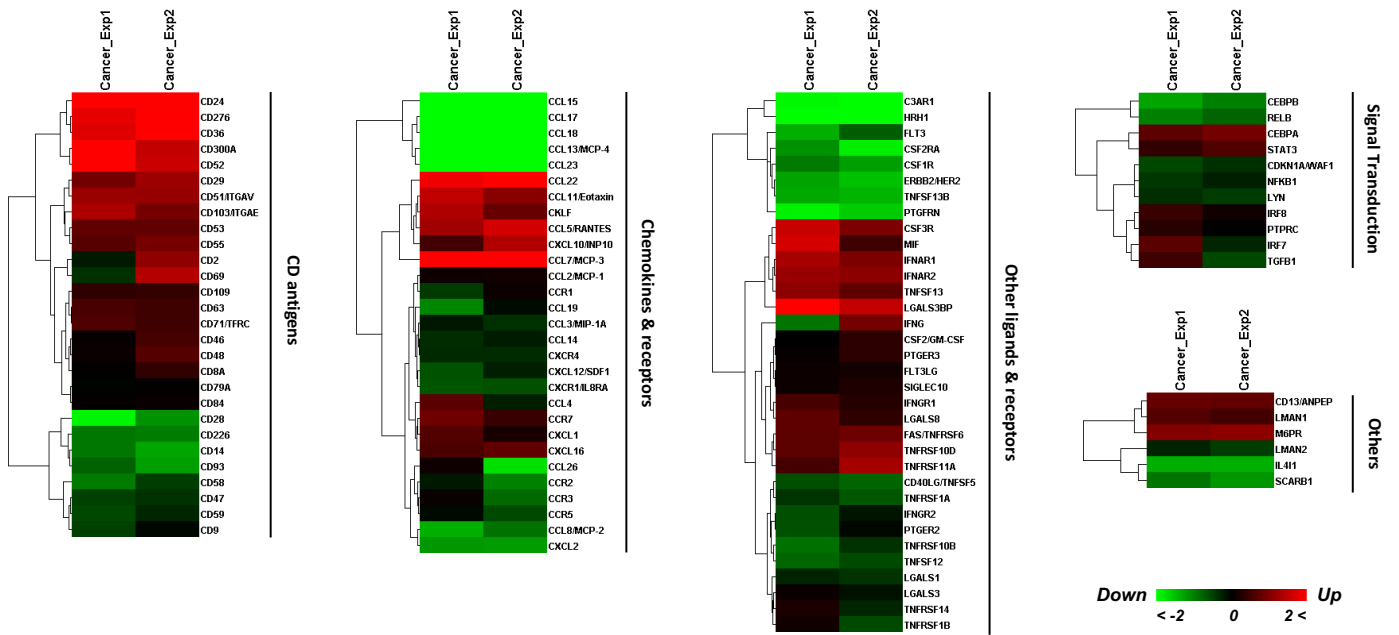

**Figure S3. Clusters of immune-related DEGs altered in tumour-induced DCs.** Heatmap for immune-related gene sets of DCs. Genes fold-changes were based on microarray data and shown in colour as indicated.

**a**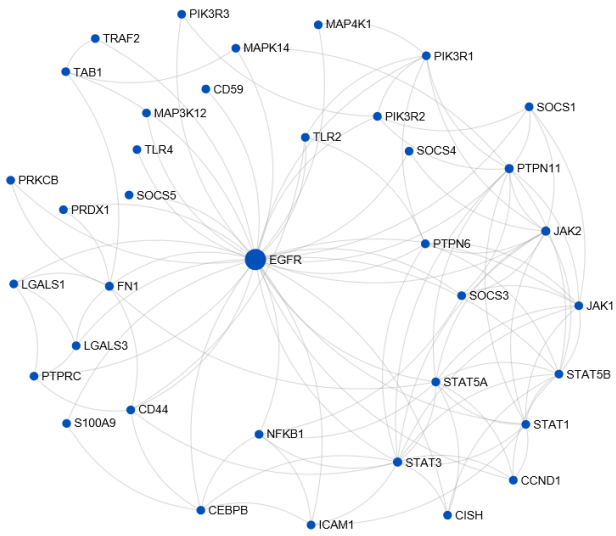**EGFR Pathway****b**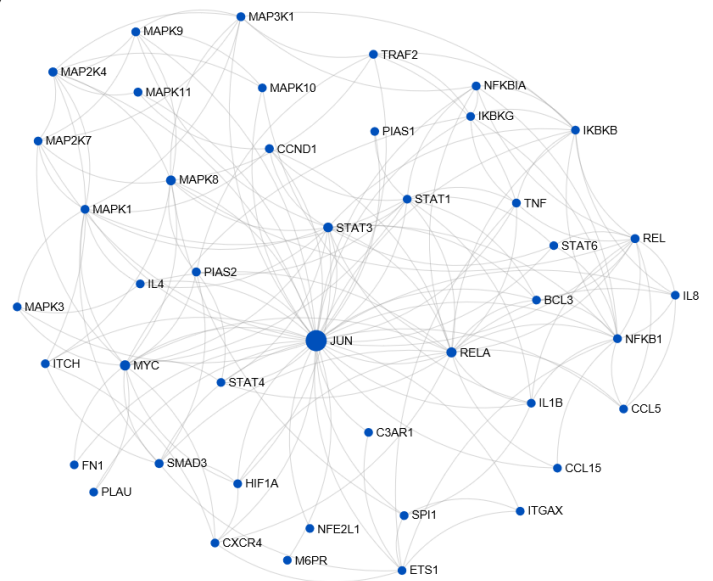**JUN Pathway**

**Figure S4. Sub-network of EGFR & JUN signaling pathways.** To obtain a detailed view of Figure 4a, sub-networks were constructed by selecting the nodes connected with EGFR (a) or JUN (b).

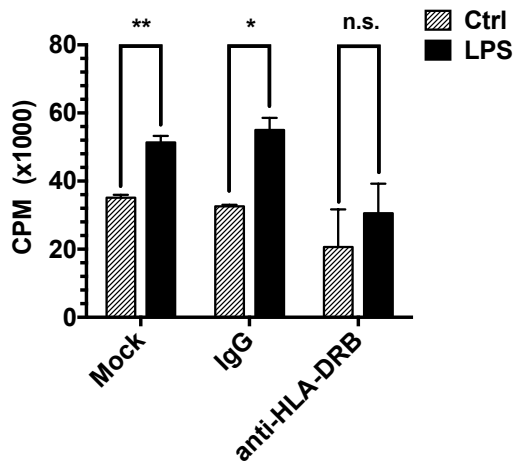

**Figure S5. Competition MLR by HLA-DR blockade.** MoDCs generated in FCS medium were co-cultured with PBMCs from another healthy donor at a ratio of 1:65, with HLA-DR blocking antibody or isotype IgG added.  $^3\text{H-TdR}$  was added on day 4, and beta liquid scintillation was measured 12-18 hours later. Error bars, SEM. n.s., none significant; \*,  $P < 0.05$ ; \*\*,  $P < 0.01$ .

**Table.S1. List of genes found to be significantly regulated in microarray experiments**

| <i>Gene ID</i>                     | <i>Symbol</i> | <i>Location</i>   | <i>Full Name</i>                                                                    | <i>Cancer Exp1</i> | <i>Cancer Exp2</i> |
|------------------------------------|---------------|-------------------|-------------------------------------------------------------------------------------|--------------------|--------------------|
| <i>Top 20 down-regulated genes</i> |               |                   |                                                                                     |                    |                    |
| 6414                               | SEPP1         | 5q31              | Selenoprotein P, Plasma, 1                                                          | 0.0329             | 0.0567             |
| 7850                               | IL1R2         | 2q12-q22          | Interleukin 1 Receptor, Type II                                                     | 0.0536             | 0.0243             |
| 339390                             | CLEC4G        | 19p13.2           | C-Type Lectin Domain Family 4, Member G                                             | 0.0993             | 0.0919             |
| 6362                               | CCL18         | 17q11.2           | Chemokine (C-C Motif) Ligand 18 (Pulmonary And Activation-Regulated)                | 0.1227             | 0.2583             |
| 283316                             | CD163L1       | 12p13.3           | CD163 Molecule-Like 1                                                               | 0.1339             | 0.0752             |
| 5031                               | P2RY6         | 11q13.5           | Pyrimidinergic Receptor P2Y, G-Protein Coupled, 6                                   | 0.1341             | 0.1066             |
| 6361                               | CCL17         | 16q13             | Chemokine (C-C Motif) Ligand 17                                                     | 0.1549             | 0.2886             |
| 23179                              | RGL1          | 1q25.3            | Ral Guanine Nucleotide Dissociation Stimulator-Like 1                               | 0.1572             | 0.1730             |
| 10462                              | CLEC10A       | 17p13.1           | C-Type Lectin Domain Family 10, Member A                                            | 0.1577             | 0.1228             |
| 3957                               | LGALS2        | 22q12-q13 22q13.1 | Lectin, Galactoside-Binding, Soluble, 2                                             | 0.1588             | 0.1544             |
| 27076                              | LYPD3         | 19q13.31          | LY6/PLAUR Domain Containing 3                                                       | 0.1604             | 0.3603             |
| 6035                               | RNASE1        | 14q11.2           | Ribonuclease, RNase A Family, 1 (Pancreatic)                                        | 0.1712             | 0.1557             |
| 3269                               | HRH1          | 3p25              | Histamine Receptor H1                                                               | 0.1841             | 0.1603             |
| 3122                               | HLA-DRA       | 6p21.3            | Major Histocompatibility Complex, Class II, DR Alpha                                | 0.1954             | 0.1637             |
| 50486                              | GOS2          | 1q32.2-q41        | G0/G1 Switch 2                                                                      | 0.2000             | 0.2014             |
| 4318                               | MMP9          | 20q11.2-q13.1     | Matrix Metalloproteinase 9                                                          | 0.2006             | 0.2749             |
| 64240                              | ABCG5         | 2p21              | ATP-Binding Cassette, Sub-Family G (WHITE), Member 5                                | 0.2059             | 0.1597             |
| 85019                              | TMEM241       | 18q11.2           | Transmembrane Protein 241                                                           | 0.2092             | 0.1686             |
| 1471                               | CST3          | 20p11.21          | Cystatin C                                                                          | 0.2156             | 0.1570             |
| 2162                               | F13A1         | 6p25.3-p24.3      | Coagulation Factor XIII, A1 Polypeptide                                             | 0.2192             | 0.1939             |
| <i>Top 20 up-regulated genes</i>   |               |                   |                                                                                     |                    |                    |
| 440992                             | RPS20P14      | 3q27.3            | Ribosomal Protein S20 Pseudogene 14                                                 | 13.6692            | 9.5598             |
| 118430                             | MUCL1         | 12q               | Mucin-Like 1                                                                        | 12.8619            | 12.2210            |
| 390107                             | RPS24P15      | 11p13             | Ribosomal Protein S24 Pseudogene 15                                                 | 9.6442             | 6.2639             |
| 130773                             | RPL23AP37     | 2p14              | Ribosomal Protein L23a Pseudogene 37                                                | 9.3945             | 5.4780             |
| 6286                               | S100P         | 4p16              | S100 Calcium Binding Protein P                                                      | 7.9978             | 6.0193             |
| 348                                | APOE          | 19q13.2           | Apolipoprotein E                                                                    | 7.9822             | 8.9974             |
| 54627                              | MAP10         | 1q42.2            | Microtubule-Associated Protein 10                                                   | 7.5633             | 3.7377             |
| 55711                              | FAR2          | 12p11.22          | Fatty Acyl CoA Reductase 2                                                          | 7.2273             | 7.8296             |
| 27306                              | HPGDS         | 4q22.3            | Hematopoietic Prostaglandin D Synthase                                              | 7.2152             | 7.5915             |
| 441533                             | RPL26P37      | Yp11.2            | Ribosomal Protein L26 Pseudogene 37                                                 | 7.0451             | 3.9103             |
| 4828                               | NMB           | 15q22-qter        | Neuromedin B                                                                        | 6.6957             | 6.0493             |
| 10114                              | HIPK3         | 11p13             | Homeodomain Interacting Protein Kinase 3                                            | 6.6845             | 4.0924             |
| 341356                             | RPL31P50      | 12p11.21          | Ribosomal Protein L31 Pseudogene 50                                                 | 6.6412             | 2.9488             |
| 253013                             | RPL31P8       | 5q12.1            | Ribosomal Protein L31 Pseudogene 8                                                  | 6.5690             | 3.7312             |
| 597                                | BCL2A1        | 15q24.3           | BCL2-Related Protein A1                                                             | 6.4727             | 3.9652             |
| 314                                | AOC2          | 17q21             | Amine Oxidase, Copper Containing 2 (Retina-Specific)                                | 6.4507             | 8.3630             |
| 432369                             | ATP5EP2       | 13q12             | ATP Synthase, H+ Transporting, Mitochondrial F1 Complex, Epsilon Subunit Pseudogene | 6.3876             | 3.2278             |
| 112942                             | CFAP36        | 2p16.1            | Cilia And Flagella Associated Protein 36                                            | 6.2681             | 4.8231             |
| 126235                             | RPS4XP21      | 19q13.11          | Ribosomal Protein S4X Pseudogene 21                                                 | 6.2045             | 3.9817             |
| 400410                             | ST20          | 15q25.1           | Suppressor Of Tumorigenicity 20                                                     | 6.1505             | 6.9169             |

**Table.S2. KEGG pathway cluster of DEGs**

| <b>ID</b> | <b>KEGG Pathway</b>                           | <b>Count</b> | <b>PValue</b> | <b>Genes Symbol</b>                                                                                                                                                                                                                                                                                                                             |
|-----------|-----------------------------------------------|--------------|---------------|-------------------------------------------------------------------------------------------------------------------------------------------------------------------------------------------------------------------------------------------------------------------------------------------------------------------------------------------------|
| hsa04640  | <b>Hematopoietic cell lineage</b>             | 28           | 2.98E-05      | CD14, CD1A, CD1C, CD33, CD36, CD3D, CD3G, CD8B, CSF1R, CSF2RA, CSF3, CSF3R, FCER2, HLA-DRA, HLA-DRB1, HLA-DRB3, HLA-DRB4, HLA-DRB5, IL1R1, IL1R2, IL3RA, IL4, IL7R, ITGA2, ITGA2B, ITGA5, ITGAM, MME, THPO                                                                                                                                      |
| hsa04612  | <b>Antigen processing and presentation</b>    | 25           | 3.37E-04      | CD74, CD8B, CTSB, HLA-DMA, HLA-DPA1, HLA-DPB1, HLA-DQA1, HLA-DQA2, HLA-DQB1, HLA-DRA, HLA-DRB1, HLA-DRB3, HLA-DRB4, HLA-DRB5, HSPA1A, HSPA5, HSPA8, IFNA14, KIR2DL3, KIR2DL4, KIR2DS4, KLRC1, LGMN, PSME2, RFX5, TAP2                                                                                                                           |
| hsa04514  | <b>Cell adhesion molecules (CAMs)</b>         | 33           | 1.21E-03      | ALCAM, CD226, CD276, CD28, CD6, CD8B, CDH1, CDH15, CDH2, CDH4, CLDN14, HLA-DMA, HLA-DPA1, HLA-DPB1, HLA-DQA1, HLA-DQA2, HLA-DQB1, HLA-DRA, HLA-DRB1, HLA-DRB3, HLA-DRB4, HLA-DRB5, ICAM1, ITGAM, ITGAV, ITGB1, JAM3, L1CAM, NFASC, NLGN2, SDC3, SDC4, SELL, SPN                                                                                 |
| hsa04610  | <b>Complement and coagulation cascades</b>    | 20           | 2.57E-03      | C1QA, C1QB, C1QC, C1R, C2, C3AR1, C5, C8B, CFD, CFH, CFI, F13A1, F2, F3, F7, PLAUI, PLAUR, SERPINA5, TFPI, VWF                                                                                                                                                                                                                                  |
| hsa05322  | <b>Systemic lupus erythematosus</b>           | 24           | 9.72E-03      | C1QA, C1QB, C1QC, C1R, C2, C5, C8B, CD28, CTSG, FCGR2A, HIST1H2BC, HIST1H2BF, HIST1H2BO, HIST1H3G, HIST1H4C, HIST1H4I, HIST1H4J, HLA-DMA, HLA-DPA1, HLA-DPB1, HLA-DQA1, HLA-DQA2, HLA-DQB1, HLA-DRA, HLA-DRB1, HLA-DRB3, HLA-DRB4, HLA-DRB5                                                                                                     |
| hsa04060  | <b>Cytokine-cytokine receptor interaction</b> | 49           | 3.22E-02      | ACVR2B, CCL11, CCL13, CCL17, CCL18, CCL20, CCL21, CCL22, CCL23, CCL3L1, CCL5, CCL7, CCL8, CCR8, CSF1R, CSF2RA, CSF3, CSF3R, CXCL2, CXCL5, EDA2R, EGFR, FIGF, IFNA14, IFNAR1, IFNAR2, IL18, IL1R1, IL1R2, IL1RAP, IL22RA2, IL28RA, IL3RA, IL4, IL7R, IL8, IL8RB, INHBC, LIFR, LTB, NGFR, PDGFB, PPBP, PRLR, TNFRSF4, TNFSF13B, XCL1, XCL2, ZFP91 |
| hsa04620  | <b>Toll-like receptor signaling pathway</b>   | 22           | 4.20E-02      | AKT2, CCL5, CD14, IFNA14, IFNAR1, IFNAR2, IKKB, IL8, IRAK1, JUN, LBP, MAP2K6, MAP3K7IP2, MAP3K8, MAPK10, MAPK12, MAPK3, NFKBIA, PIK3CG, RAC1, SPP1, TICAM2                                                                                                                                                                                      |
| hsa04062  | <b>Chemokine signaling pathway</b>            | 36           | 4.69E-02      | ADRBK1, ADRBK2, AKT2, BCAR1, CCL11, CCL13, CCL17, CCL18, CCL20, CCL21, CCL22, CCL23, CCL3L1, CCL5, CCL7, CCL8, CCR8, CSK, CXCL2, CXCL5, GNGT2, IKKB, IL8, IL8RB, MAPK3, NFKBIA, PAK1, PIK3CG, PPBP, PRKCB1, RAC1, RAP1B, STAT2, TIAM1, XCL1, XCL2                                                                                               |



**Table.S3. Top Nodes in DEGs Signaling Network**

| <i>Id</i> | <i>Label</i> | <i>Degree</i> | <i>Betweenness</i> |
|-----------|--------------|---------------|--------------------|
| Q04206    | RELA         | 65            | 2989.63            |
| P42224    | STAT1        | 50            | 218.86             |
| P40763    | STAT3        | 48            | 921.64             |
| Q9Y4K3    | TRAF6        | 44            | 1869.04            |
| P05412    | JUN          | 43            | 1648.73            |
| P19838    | NFKB1        | 43            | 654.75             |
| O15111    | CHUK         | 39            | 826.84             |
| Q12933    | TRAF2        | 38            | 724.53             |
| P00533    | EGFR         | 36            | 1300.43            |
| P17676    | CEBPB        | 34            | 449.98             |
| Q9Y6K9    | IKBKJ        | 33            | 520.26             |
| O14920    | IKKBJ        | 33            | 194.69             |
| Q06124    | PTPN11       | 32            | 546.11             |
| P29350    | PTPN6        | 31            | 947.64             |
| Q04864    | REL          | 30            | 93.3               |
| P01106    | MYC          | 29            | 1069.4             |
| P27986    | PIK3R1       | 29            | 0                  |
| P23458    | JAK1         | 28            | 380.91             |
| O43318    | MAP3K7       | 28            | 0                  |
| P19438    | TNFRSF1A     | 25            | 556.83             |
| P42226    | STAT6        | 25            | 51.36              |
| O60674    | JAK2         | 24            | 329.28             |
| P02751    | FN1          | 23            | 1054.3             |
| Q13114    | TRAF3        | 23            | 178.67             |
| Q00653    | NFKB2        | 23            | 177.76             |
| O14543    | SOCS3        | 22            | 1005.94            |
| P28482    | MAPK1        | 22            | 572.08             |
| P45983    | MAPK8        | 22            | 323.94             |
| P45985    | MAP2K4       | 22            | 180.66             |
| Q99683    | MAP3K5       | 22            | 153.37             |

**Table.S4. Inhibitory receptor expression screen**

| <i>Entrez ID</i> | <i>Symbol</i> | <i>Other Name</i> | <i>Gene name</i>                                                                         | <i>Cancer Exp1</i> | <i>Cancer Exp2</i> |
|------------------|---------------|-------------------|------------------------------------------------------------------------------------------|--------------------|--------------------|
| 80381            | CD276         | B7H3              | CD276 molecule                                                                           | 2.574              | 3.293              |
| 84868            | HAVCR2        | Tim3              | hepatitis A virus cellular receptor 2                                                    | 2.199              | 2.475              |
| 5175             | PECAM1        | CD31              | platelet/endothelial cell adhesion molecule (CD31 antigen)                               | 1.557              | 1.427              |
| 4345             | CD200         | OX2               | CD200 molecule                                                                           | 1.534              | 1.457              |
| 7301             | TYRO3         |                   | TYRO3 protein tyrosine kinase                                                            | 0.579              | 0.556              |
| 10288            | LILRB2        | ILT4              | leukocyte immunoglobulin-like receptor, subfamily B (with TM and ITIM domains), member 2 | 0.522              | 0.374              |
| 50856            | CLEC4A        | DCIR              | C-type lectin domain family 4, member A                                                  | 0.485              | 0.458              |
| 2212             | FCGR2A        | FcγRIIA           | Fc fragment of IgG, low affinity IIa, receptor (CD32)                                    | 0.259              | 0.188              |
| 10462            | CLEC10A       | CD301             | C-type lectin domain family 10, member A                                                 | 0.158              | 0.123              |

**Table.S5. qRT Primers**

| <b>Gene</b>    | <b>Forward Primer</b>      | <b>Reverse Primer</b>     |
|----------------|----------------------------|---------------------------|
| <b>Actin</b>   | CATGTACGTTGCTATCCAGGC      | CTCCTTAATGTCACGCACGAT     |
| <b>GAPDH</b>   | CCATGTTCTGTCATGGGTGTGAACCA | GCCAGTAGAGGCAGGGATGATGTTT |
| <b>HLA-DMA</b> | TGATCCAGCAAATAGGGCCA       | CTCTGGACACCGGATTTTC       |
| <b>HLA-DMB</b> | AAAGACACCCTGATGCAGCG       | TGTGGACAATTCTGAAGCC       |
| <b>HLA-DOA</b> | TGGCCAGACCAGCTTCTAT        | GGAACTTGCGGAACAAATGG      |
| <b>HLA-DPB</b> | GGGACACAGCGCTTCTGGAG       | CAAGCAGGTTGTGGTGCTGCA     |
| <b>HLA-DQA</b> | CTCTGACCACCGTGATGAGC       | CTCTCCAGGTCCACGTAGAA      |
| <b>HLA-DQB</b> | CGAGTACTGGAACAGCCAGAAGG    | GGAGTCATTTCCAGCATCACCAGG  |
| <b>HLA-DRB</b> | CACCAGACCACGTTTCTTGGAGT    | CACGTTCTCCTCTGGTTATGGA    |
| <b>CD74</b>    | TGGAGAACCTGCGCATGAAG       | CTTGGTGGCATTCTGCATGG      |
| <b>CIITA</b>   | CCTGCTGTTCCGGACCTAAA       | GGATCCGCACCAGTTTGG        |
| <b>IL1b</b>    | AGCTACGAATCTCCGACCAC       | CGTTATCCCATGTGTCGAAGAA    |
| <b>IL1R1</b>   | ATGAAATTGATGTTCTGTCCTGT    | ACCACGCAATAGTAATGTCCTG    |
| <b>IL1R2</b>   | ATGTTGCGCTTGACGTGTTG       | CCCGCTTGTAAATGCCTCCC      |
| <b>IL1RAP</b>  | GGGGACTAGACCATGAGG         | ACCAGATCAGAGTAAGGCCAG     |
| <b>IL1RN</b>   | CATTGAGCCTCATGCTCTGTT      | CACTGTCTGAGCGGATGAA       |
| <b>IL6</b>     | CCAGGAGCCCAGCTATGAAC       | GATGCCGTGAGGATGTACC       |
| <b>IL10</b>    | TCAAGGCGCATGTGAACTCC       | GATGTCAAACCTCACTCATGGCT   |
| <b>IFNG</b>    | TCGGTAACTGACTTGAATGTCCA    | TCGCTTCCCTGTTTTAGCTGC     |
| <b>TNF</b>     | CCTCTCTAATCAGCCCTCTG       | GAGGACCTGGGAGTAGATGAG     |
| <b>NFKB1</b>   | AACAGAGAGGATTTGTTTTCCG     | TTTGACCTGAGGGTAAGACTTCT   |
| <b>RelA</b>    | ATGTGGAGATCATTGAGCAGC      | CCTGGTCTGTGTAGCCATT       |
| <b>IRF8</b>    | AGTAGCATGTATCCAGGACTGAT    | CACAGCGTAACCTCGTCTTC      |
| <b>MafB</b>    | GACGCAGCTCATTGAGCAG        | CCGGAGTTGGCGAGTTTCT       |
| <b>STAT2</b>   | GAGCCAGCAACATGAGATTGA      | GCCTGGATCTTATATCGGAAGCA   |
| <b>TAP1</b>    | TCTCCTCTCTGGGGAGATG        | GAGACATGATGTTACCTGTCTG    |
| <b>TRAF2</b>   | GCTCATGCTGACCGAATGTC       | GCCGTCACAAGTTAAGGGGAA     |
| <b>TRAF3</b>   | GCGTGTCAAGAGAGCATCGTT      | GCAGATGTCCAGCATTAACT      |
| <b>BIC</b>     | TGGCTCTCCACCCAATGG         | AGAATTTAAACCACAGATTTCC    |
